# Supplementary material for: Prediction of the Impact of Meteorological Conditions on Air Quality during the 2022 Beijing Winter Olympics
Source: MDPI journal article supplement (doi:10.3390/su14084574), 2022-04-12
Supplement: s1 [file s1]

# Supplemental Material

**Title:** Prediction of the Impact of Meteorological Conditions on Air Quality during the 2022 Beijing Winter Olympics

**Author List:**

- 1) Taihao Wang: College of Meteorology and Oceanology, National University of Defense Technology, Changsha 410073, China; Email: wth19980422@163.com
- 2) Huadong Du: College of Meteorology and Oceanology, National University of Defense Technology, Changsha 410073, China; Email: dhuadong1234@163.com
- 3) Zezheng Zhao: College of Meteorology and Oceanology, National University of Defense Technology, Changsha 410073, China; Email: zzezheng1997@163.com
- 4) Zeming Zhou: College of Meteorology and Oceanology, National University of Defense Technology, Changsha 410073, China; Email: zzeming2019@163.com
- 5) Ana Russo: Instituto Dom Luíz, Faculdade de Ciências da Universidade de Lisboa, Campo Grande, Edifício C1, Piso 1, 1749-016 Lisboa, Portugal; Email: acrusso@fc.ul.pt
- 6) Hailing Xi: Research Institute of Chemical Defense, Beijing 102205, China; Email: xhailing6666@163.com
- 7) Jiping Zhang: Institute of Atmospheric Physics, Chinese Academy Sciences, Beijing 100029, China; Email: zhangjp@pku.edu.cn

**Corresponding author:**

Dr. Chengjun Zhou; Email: nudt\_zcj@foxmail.com

College of Meteorology and Oceanology, National University of Defense Technology, Changsha 410073, China;

Bureau of Audit of Foshan Municipality, Foshan 528000, China.

Tel: (+86) 13516618186

## **Table of Contents**

- 1. Figure S1.** Trend of PM<sub>2.5</sub> and CO concentrations during the Beijing Winter Olympic Game (2022.02.04-2022.02.20)
- 2. Figure S2.** Trend of NO<sub>2</sub> and SO<sub>2</sub> concentrations during the Beijing Winter Olympic Games (2022.02.04-2022.02.20)
- 3. Table S1.** Concentration range and mean values of PM<sub>2.5</sub>, NO<sub>2</sub>, SO<sub>2</sub>, and CO during the Beijing Winter Olympics and during 2.17 – 2.19 (2022)

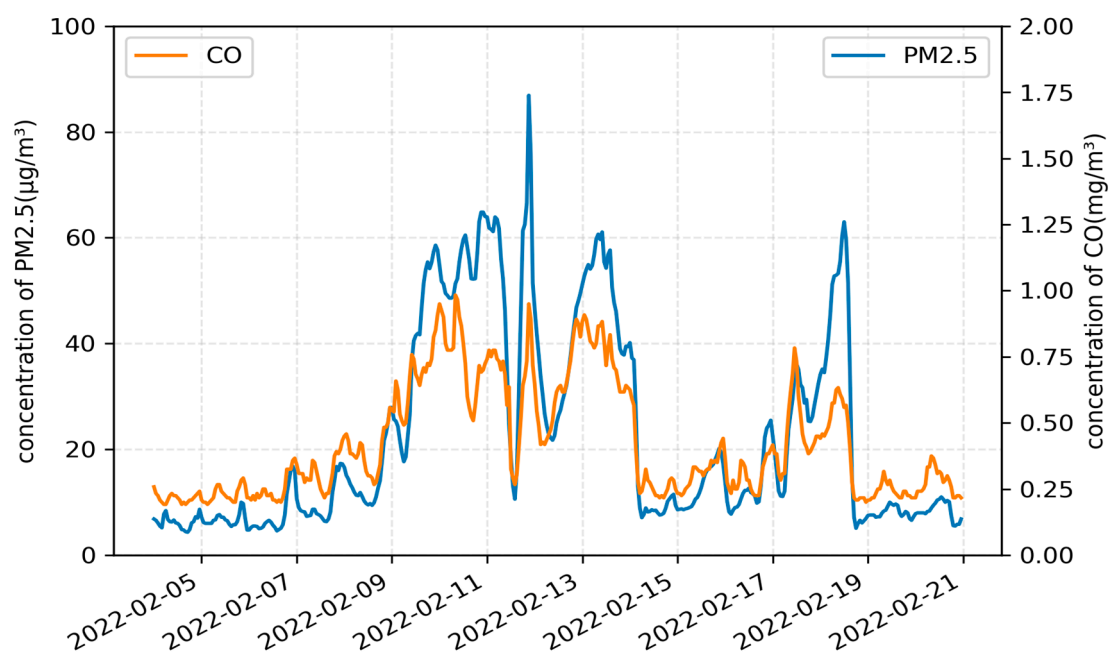

Figure S1. Trend of PM2.5 and CO concentrations during the Beijing Winter Olympic Game (2022.02.04-2022.02.20)

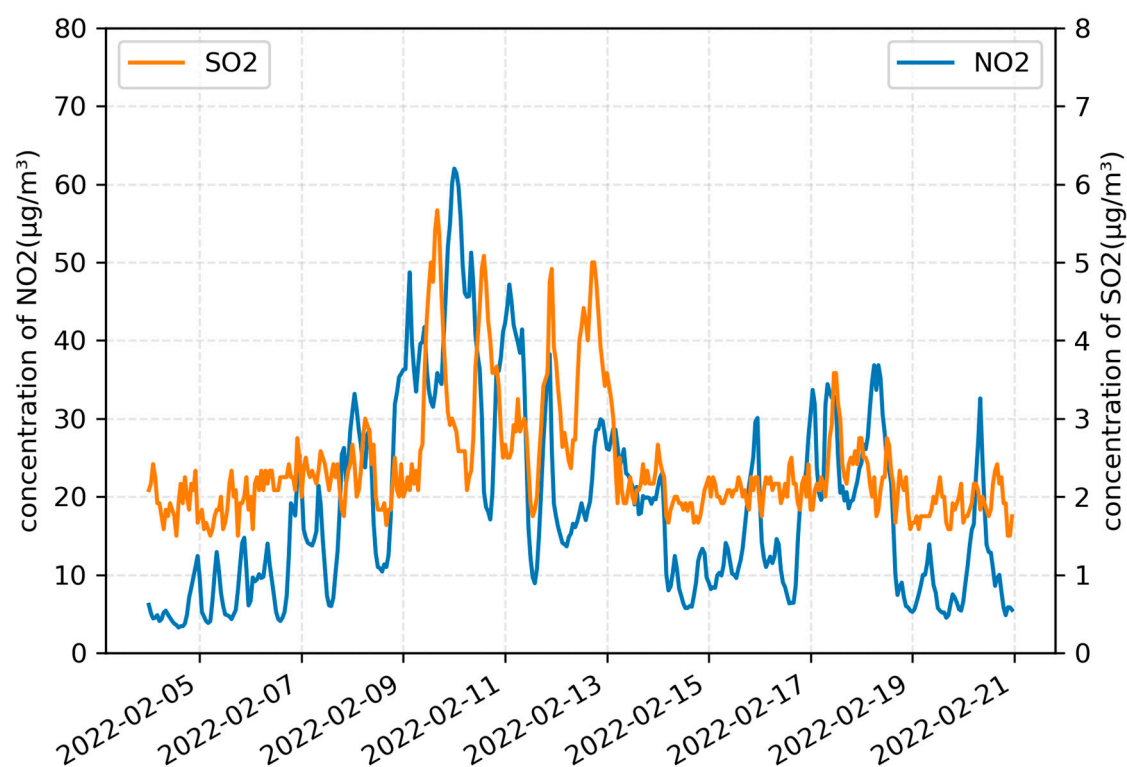

Figure S2. Trend of NO2 and SO2 concentrations during the Beijing Winter Olympic Games (2022.02.04-2022.02.20)

Table S1. Concentration range and mean values of PM2.5, NO2, SO2, and CO during the Beijing Winter Olympics and during 2.17 – 2.19 (2022)

| <b>Pollutants</b>                    | <b>Range in all period(mean)</b> | <b>Range in 17th-19th(mean)</b> |
|--------------------------------------|----------------------------------|---------------------------------|
| SO <sub>2</sub> (μg/m <sup>3</sup> ) | 1.51-5.67 (2.51)                 | 1.58-3.58 (2.17)                |
| NO <sub>2</sub> (μg/m <sup>3</sup> ) | 3.25-62.01 (18.85)               | 4.51-33.81 (18.12)              |
| CO (mg/m <sup>3</sup> )              | 0.19-0.98 (0.46)                 | 0.21-0.78 (0.38)                |
| PM2.5 (μg/m <sup>3</sup> )           | 4.33-86.92 (25.81)               | 5.11-63.01 (22.38)              |
